# Supplementary material for: Antiandrogen-Equipped Histone Deacetylase Inhibitors Selectively Inhibit Androgen Receptor (AR) and AR-Splice Variant (AR-SV) in Castration-Resistant Prostate Cancer (CRPC)
Source: MDPI journal article supplement (doi:10.3390/cancers15061769), 2023-03-15

Figure S1

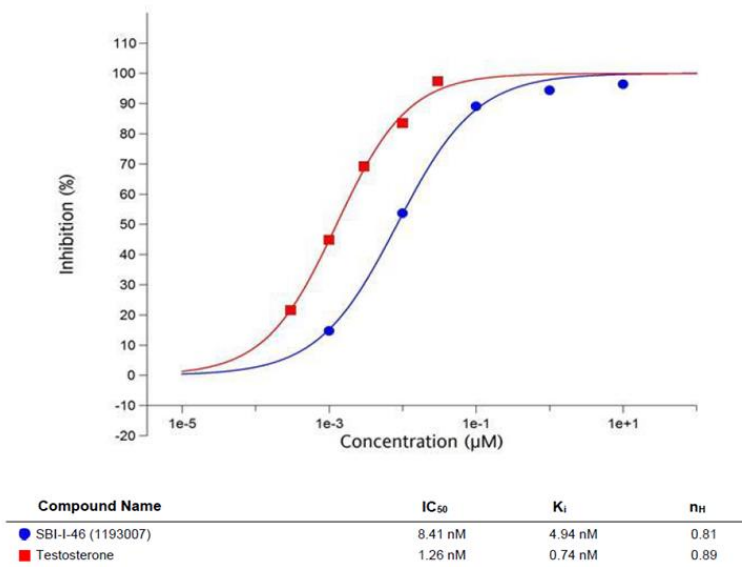

Figure S2

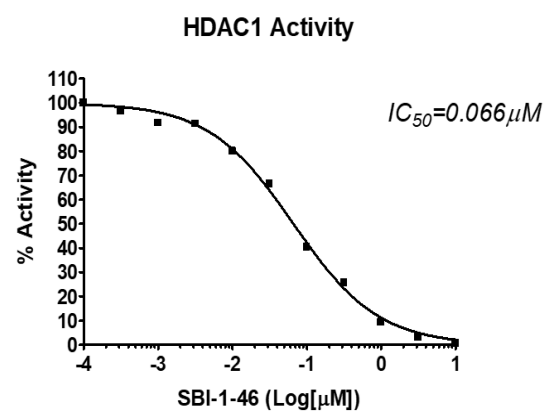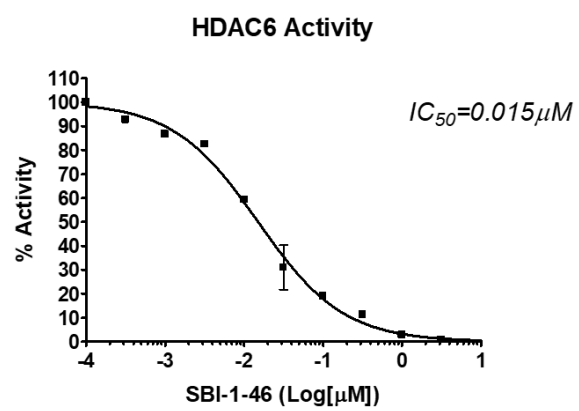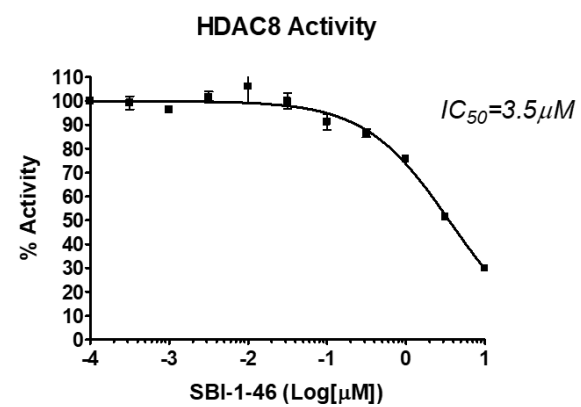

Figure S3

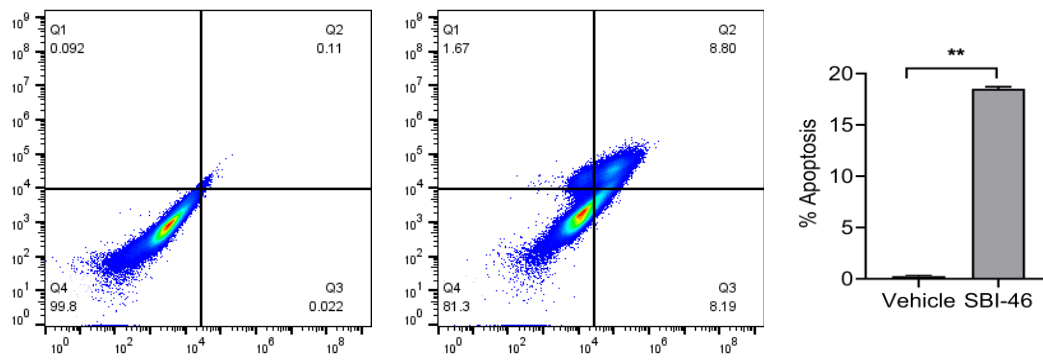

Figure S4

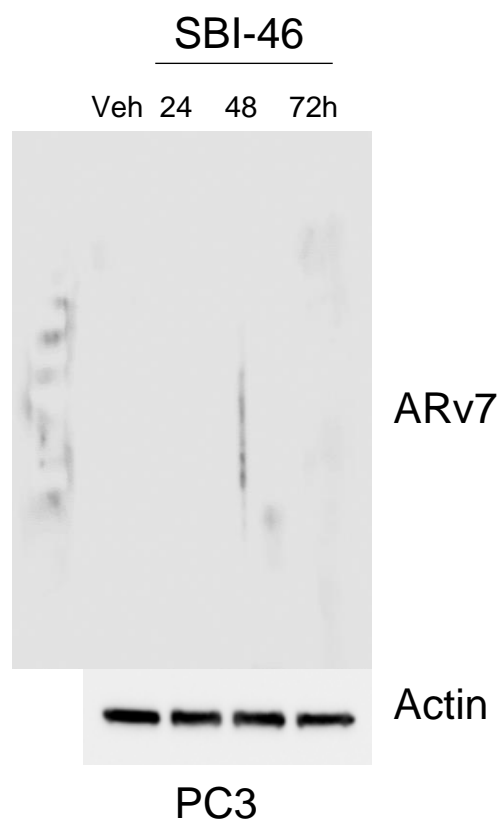

Fig.1E

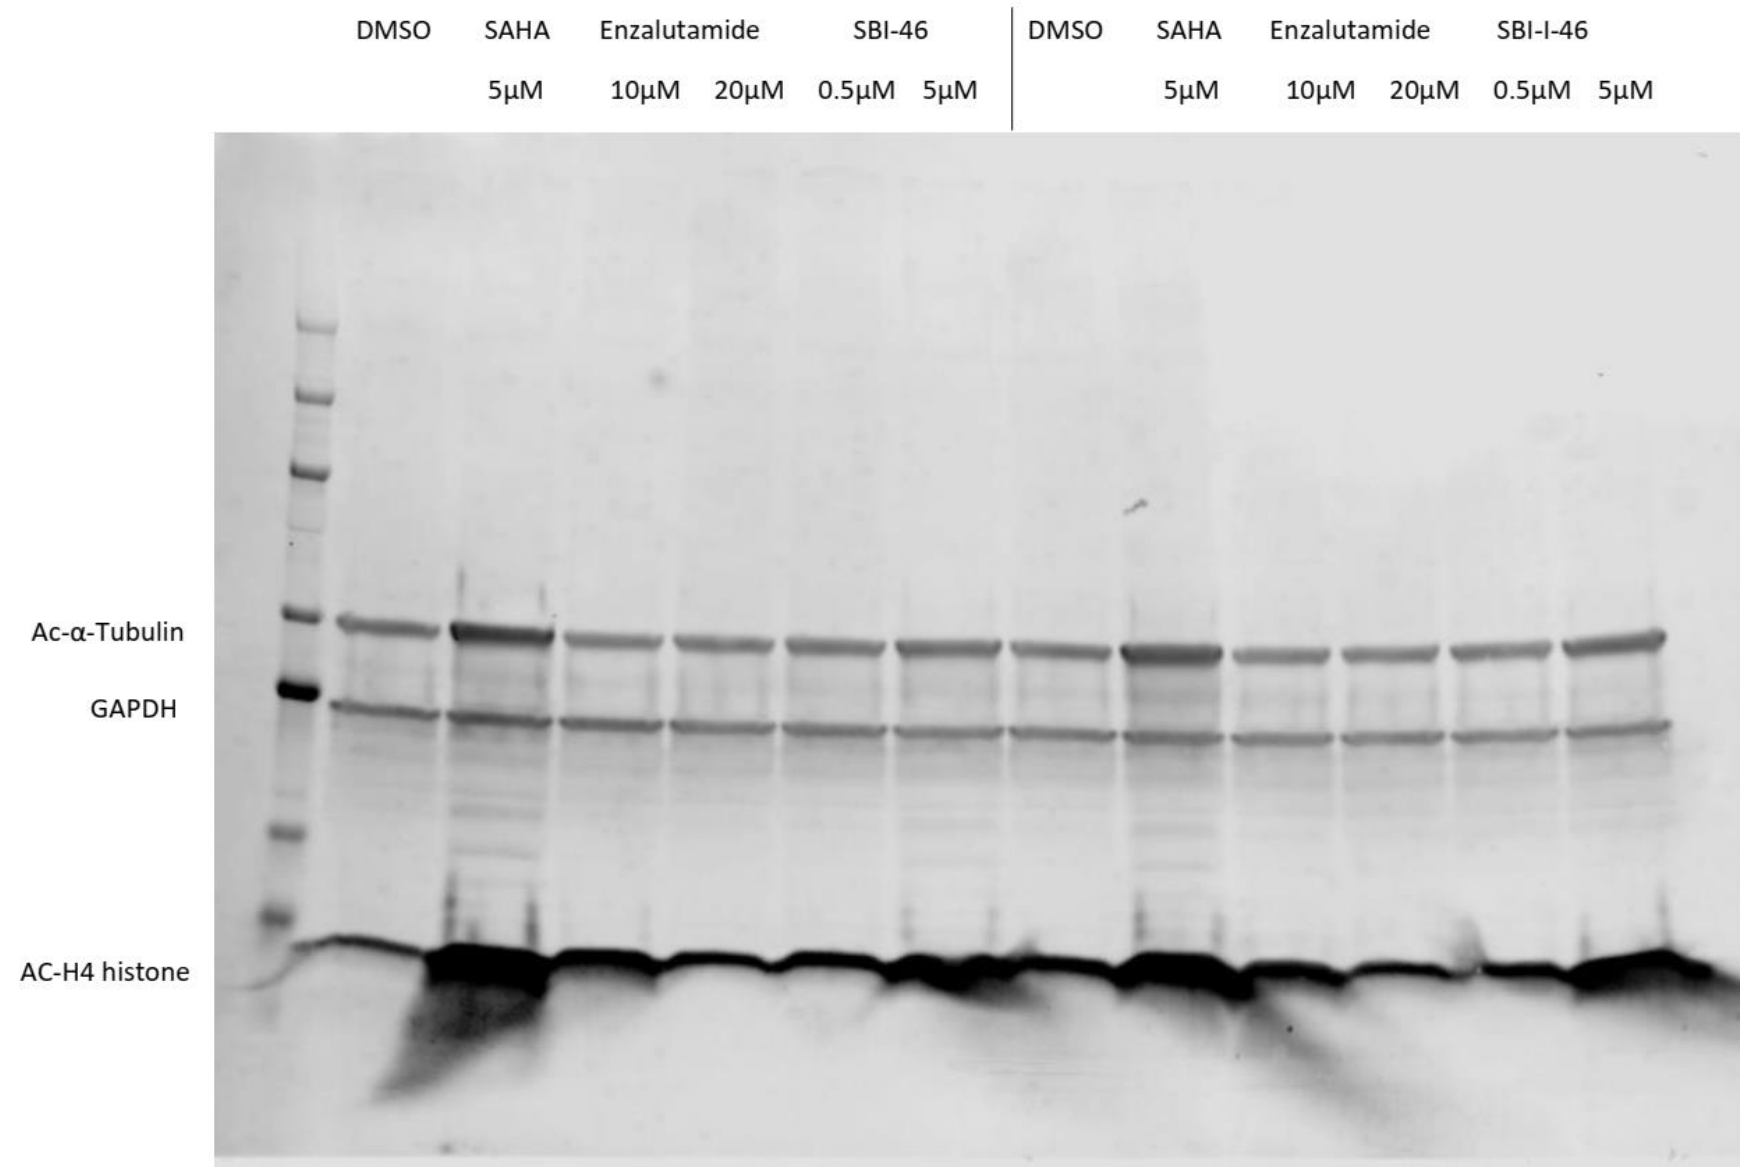

Fig.1F

AR

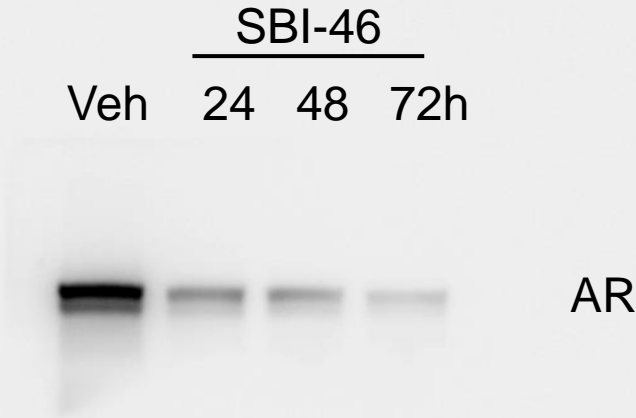

Fig.1F

PSA

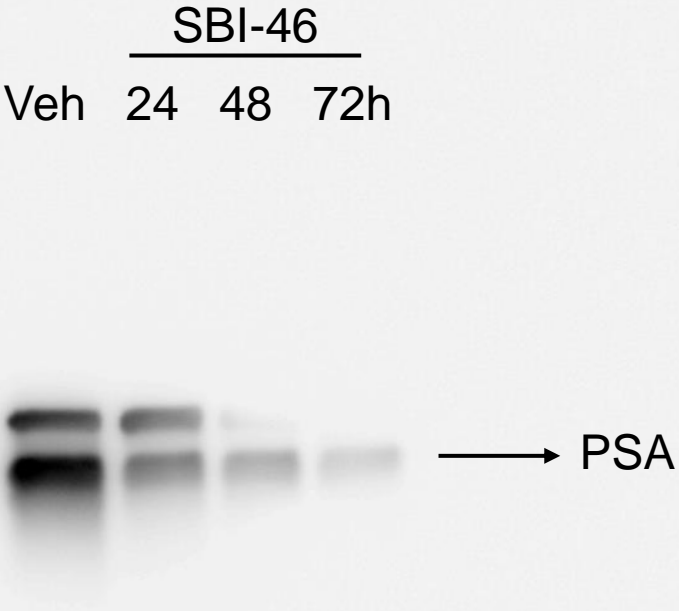

Fig.1F

Actin

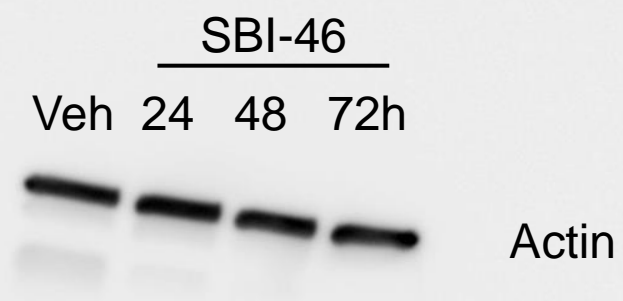



Fig.1G

AR

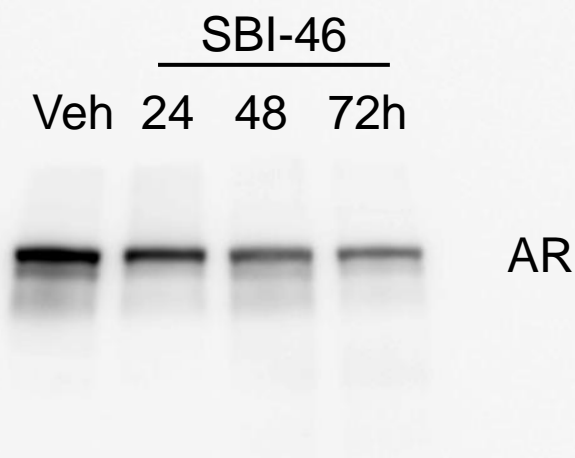

Fig.1G

PSA

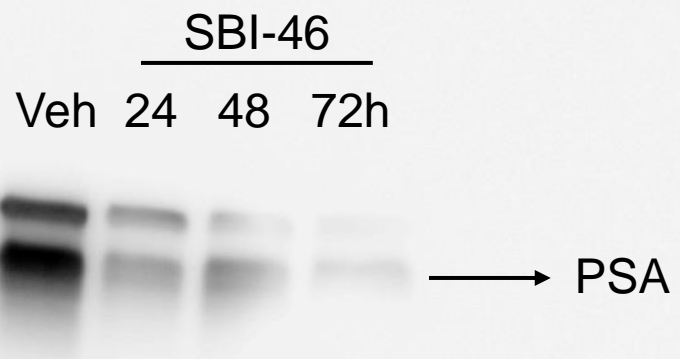

Fig.1G

Actin

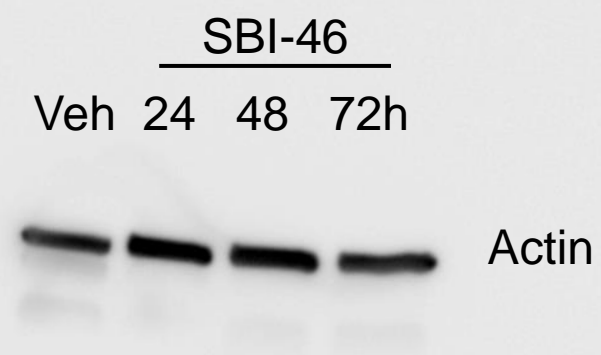

Fig.1H

AR

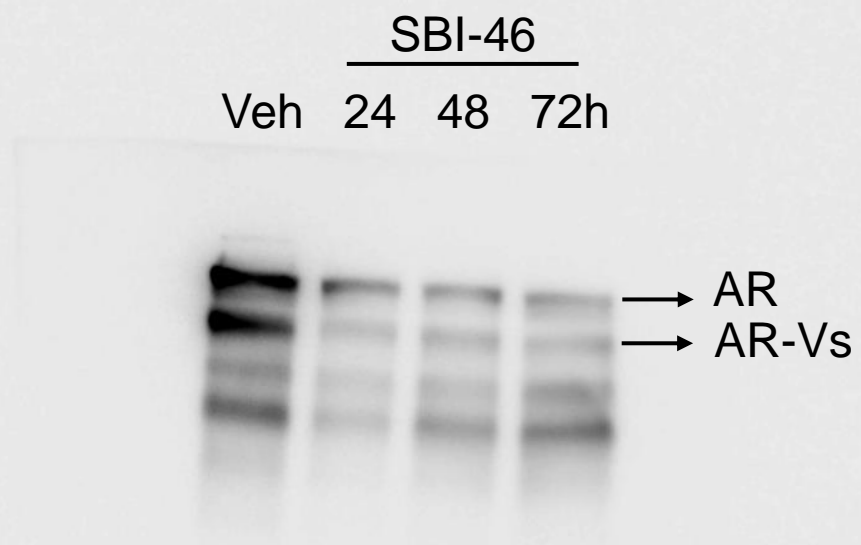

Fig.1H

PSA

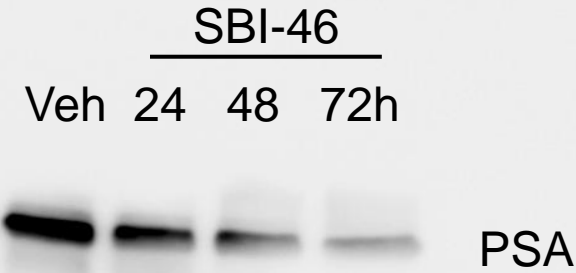

Fig.1H

Actin

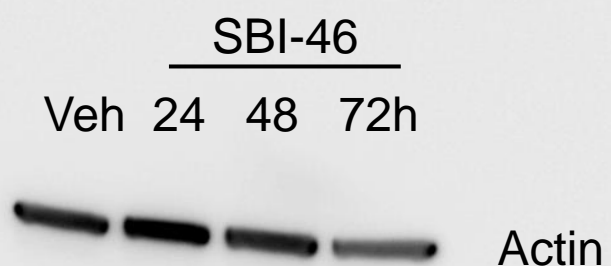

Fig.2E

AR

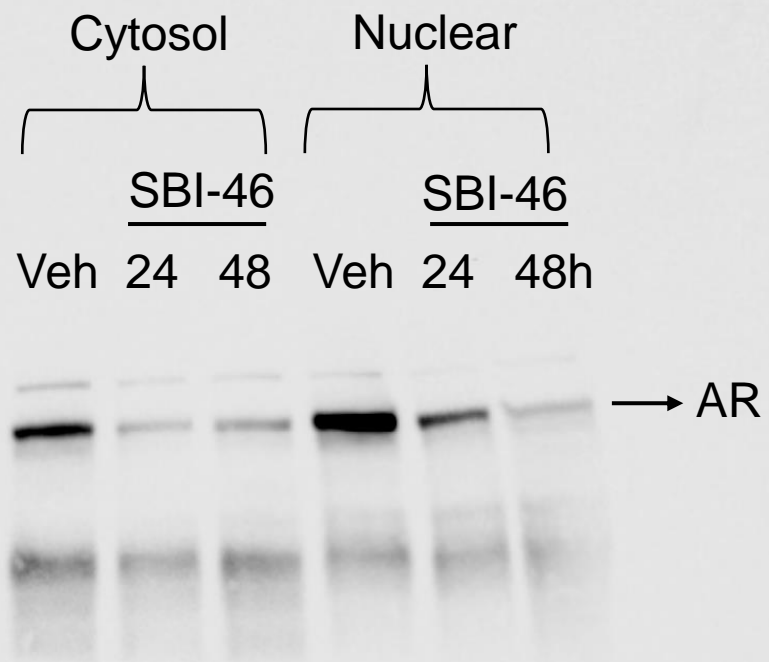

Fig.2E

Actin

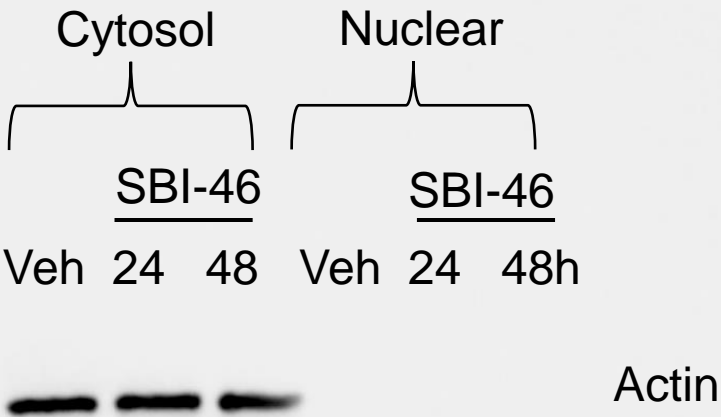



Fig.2E

Histone 3

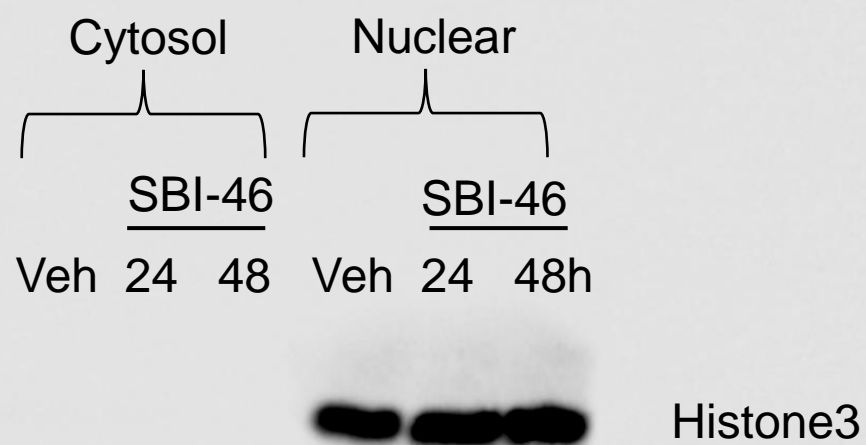

Fig.2F

AR

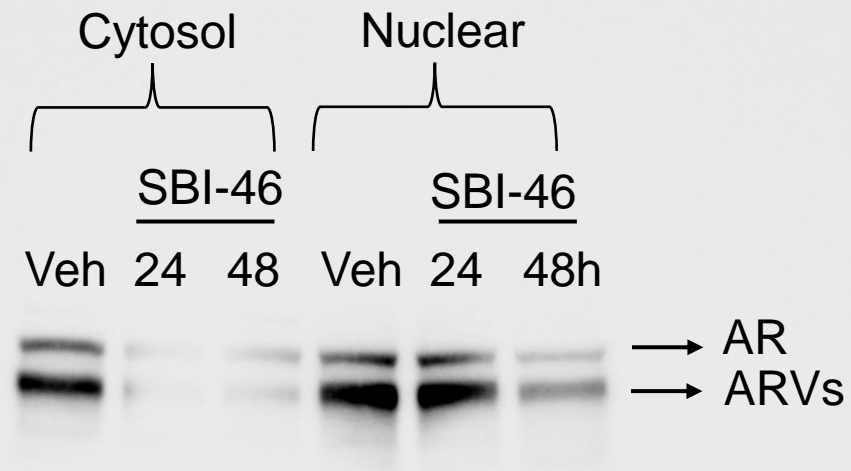

Fig.2F

ARV7

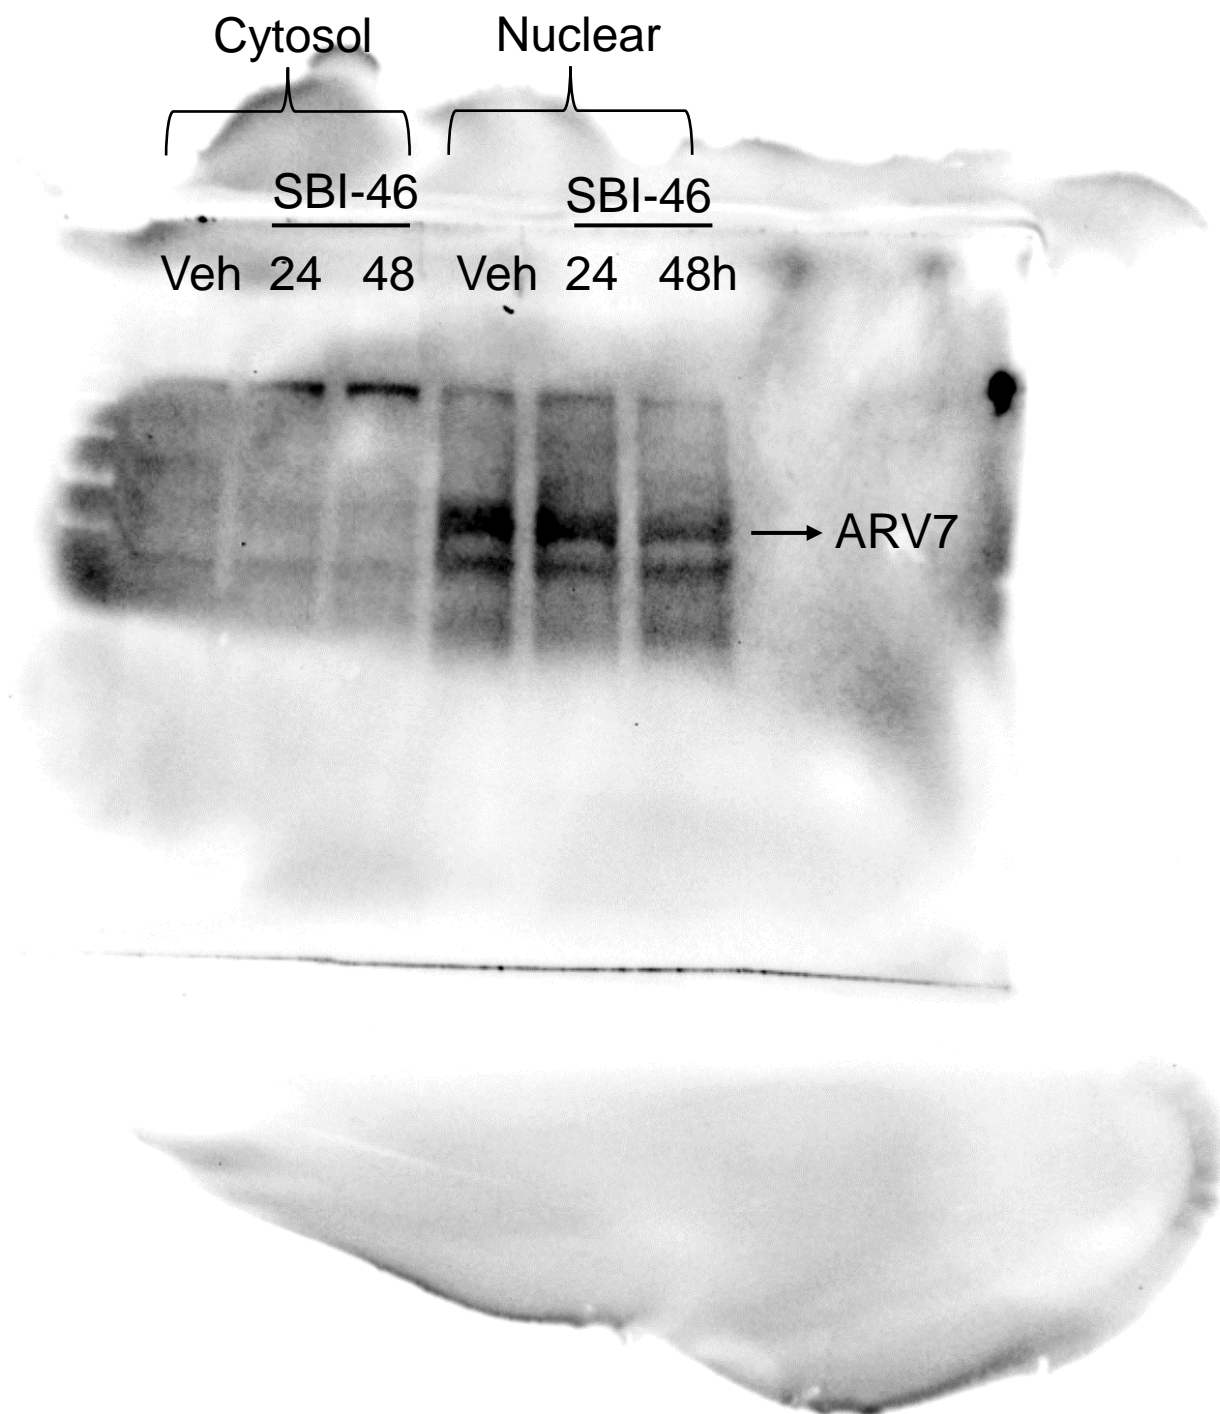

Fig.2F

Actin

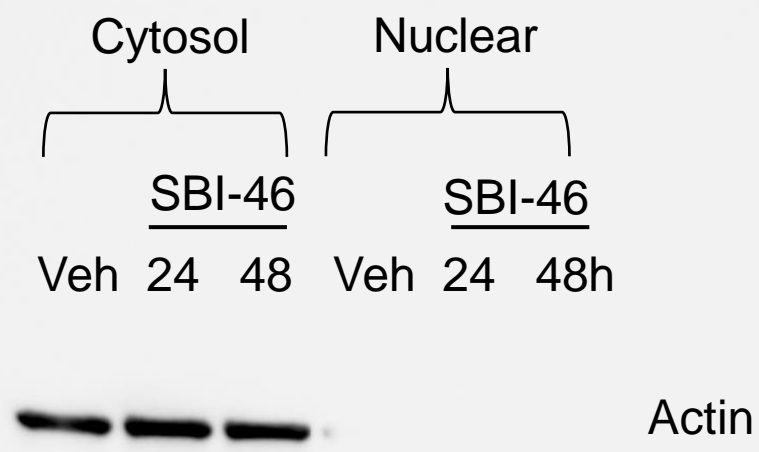

Fig.2F

Histone 3

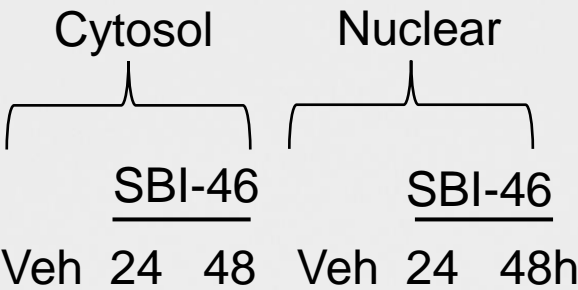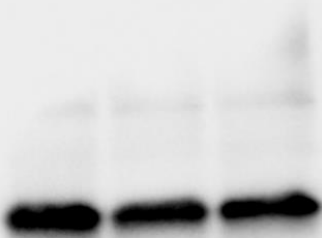

Fig.3A

AR

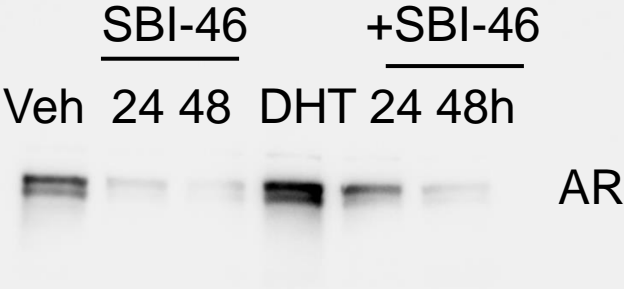

Fig.3A

PSA

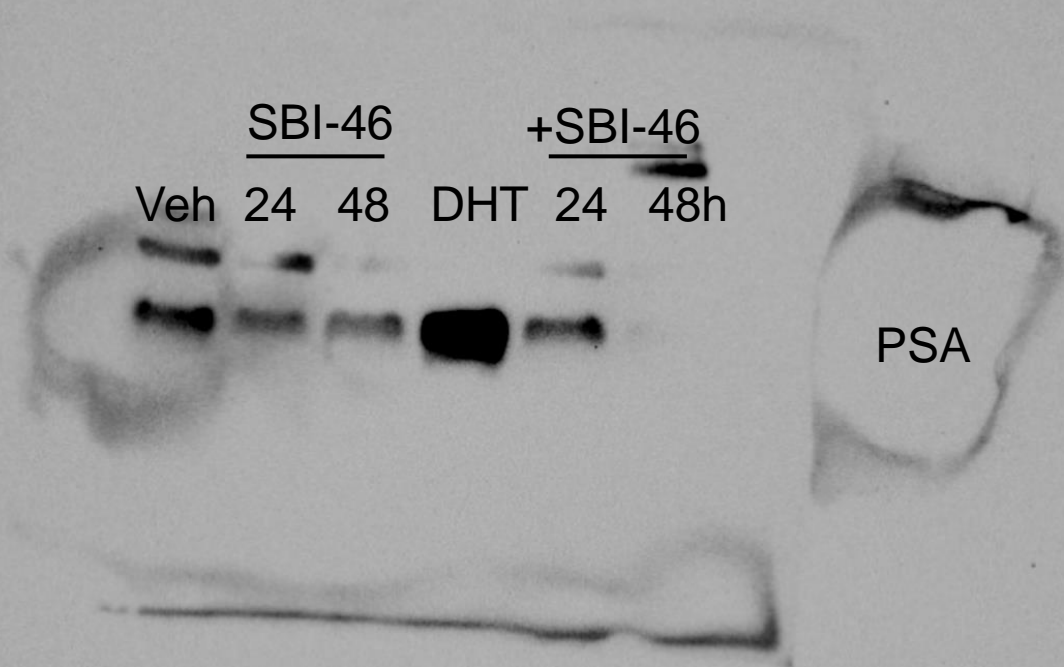

Fig.3A

Actin

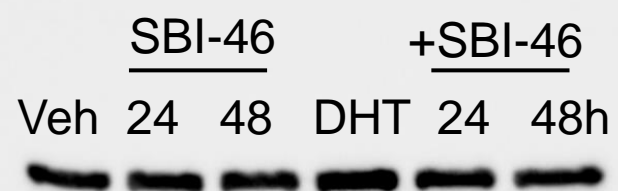



Fig.3B

AR

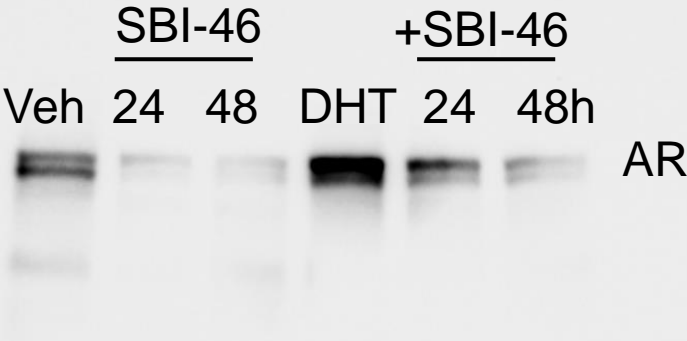

PSA

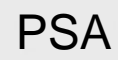

Fig.3B

Actin

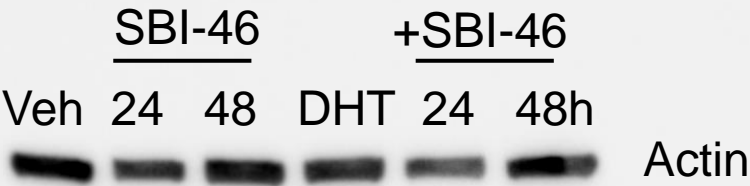

Fig.3C

AR

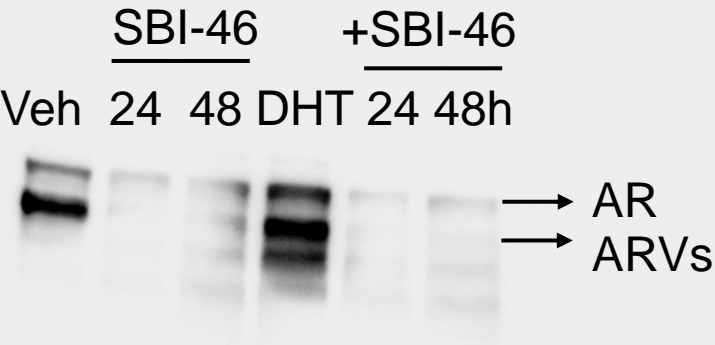

Fig.3C

PSA

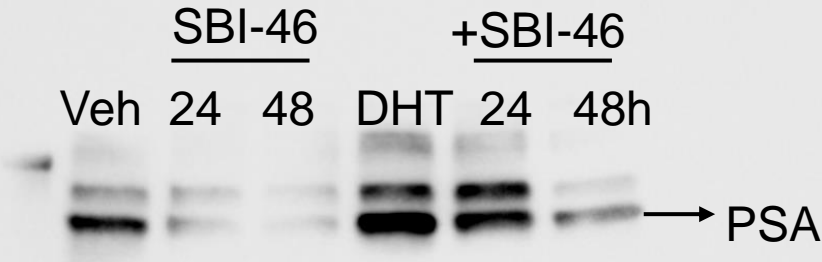

Fig.3C

Actin

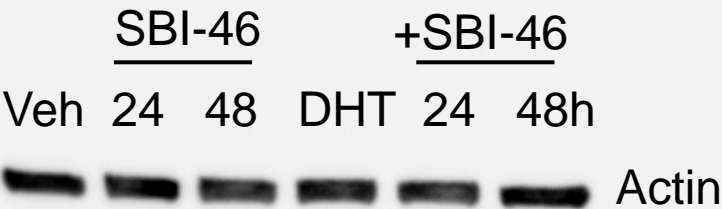

Fig.4A

Cleaved  
PARP

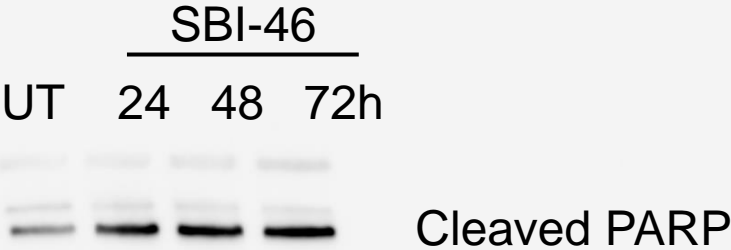

Fig.4A

Cleaved  
Caspase 9

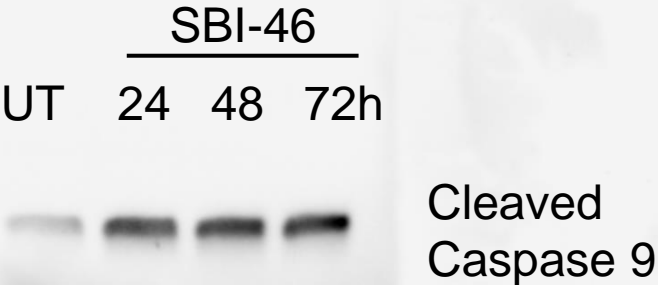



Fig.4A

Actin

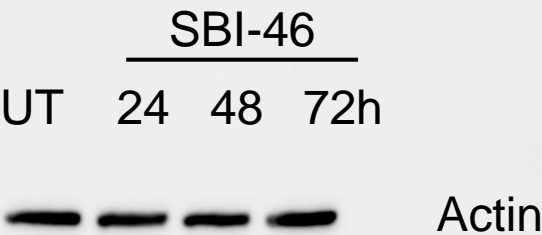

Fig.4B

Cleaved  
PARP

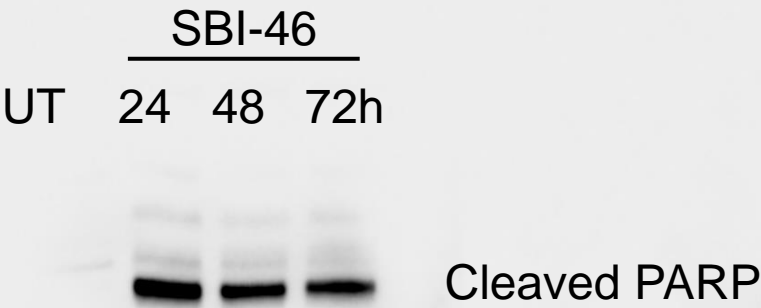

Fig.4B

Cleaved  
Caspase 9

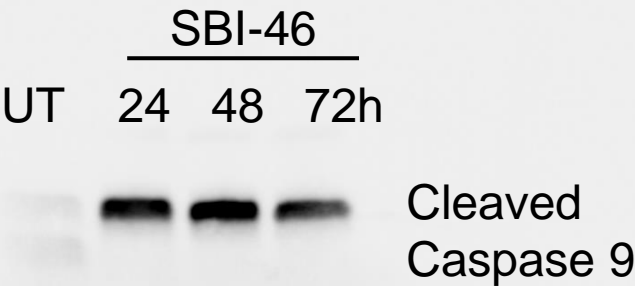

Fig.4B

Actin

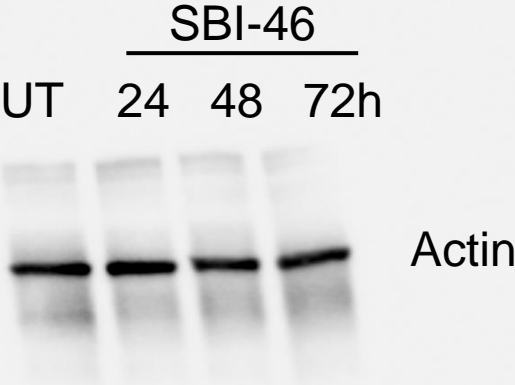

Fig.4C

Cleaved  
PARP

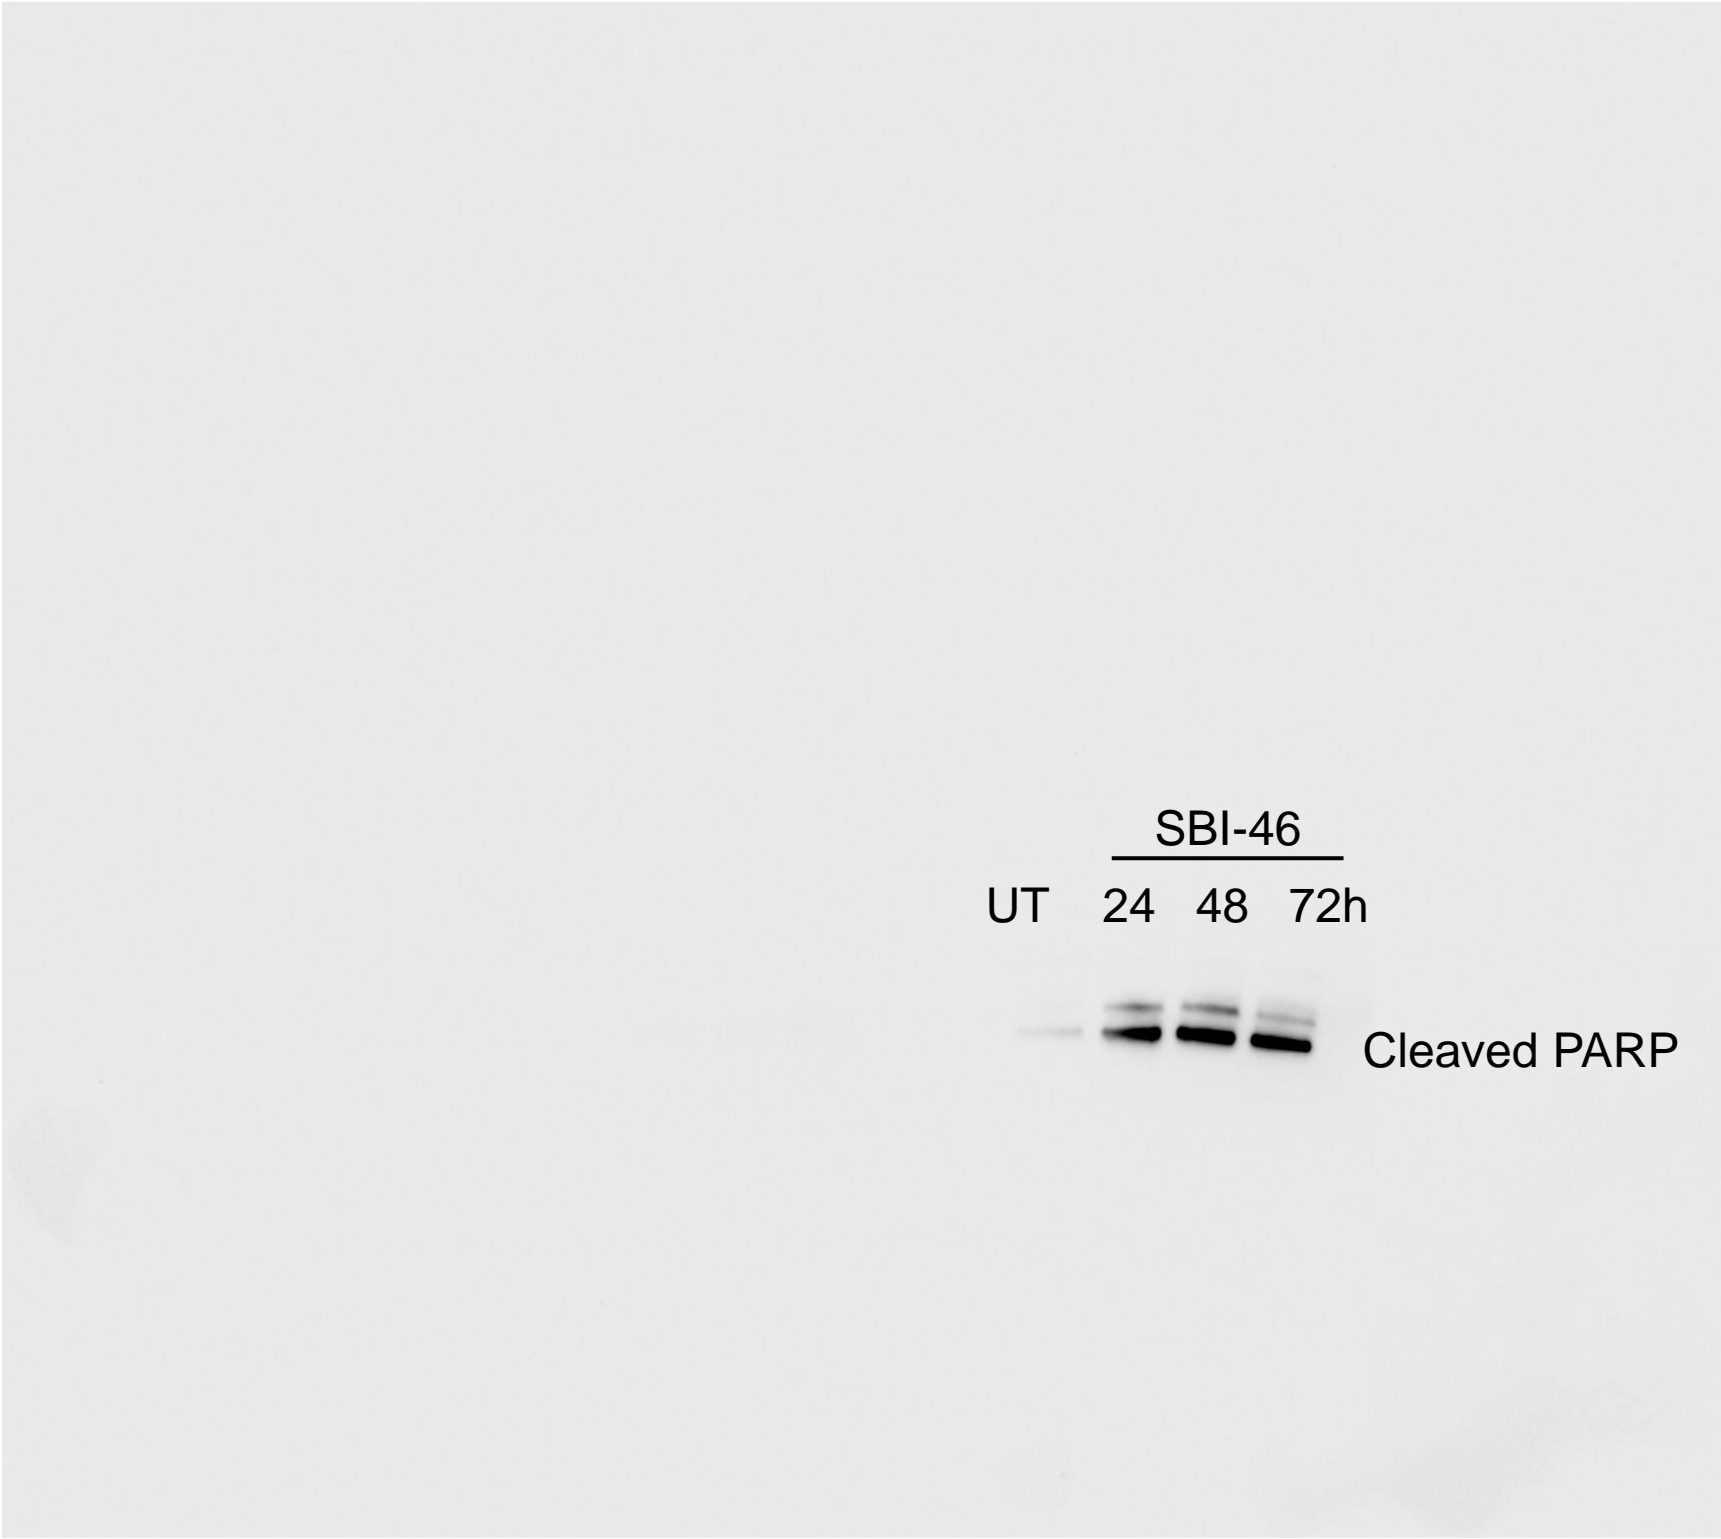

Fig.4C

Cleaved  
Caspase 9

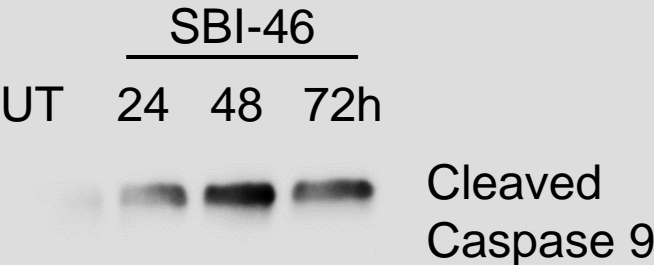

Fig.4C

Actin

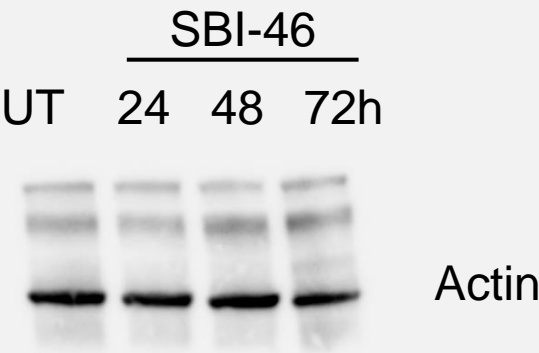

Fig.4D

Bax

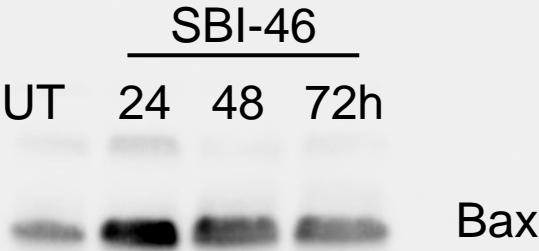



Fig.4D

BCL2

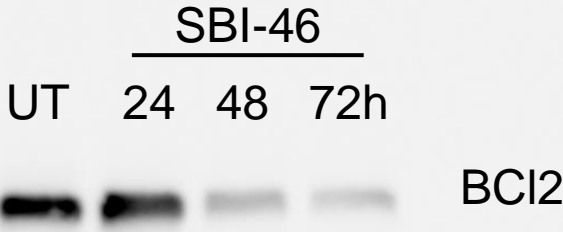

Fig.4D

BCL-xl

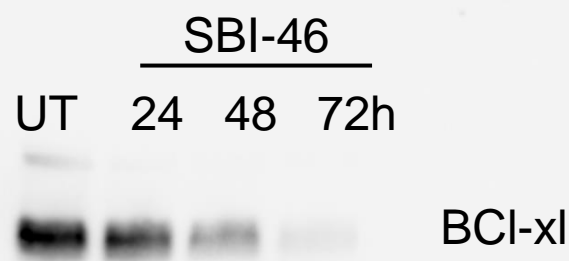

Fig.4D

Actin

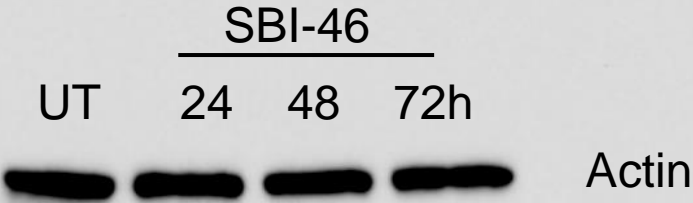

Fig.4E

Bax

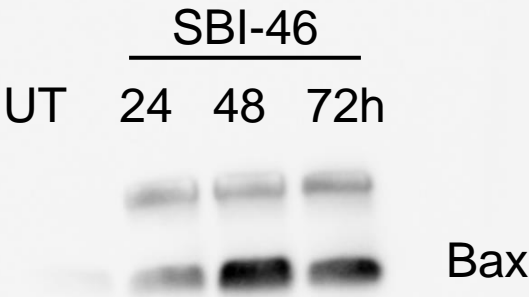

Fig.4E

Bcl2

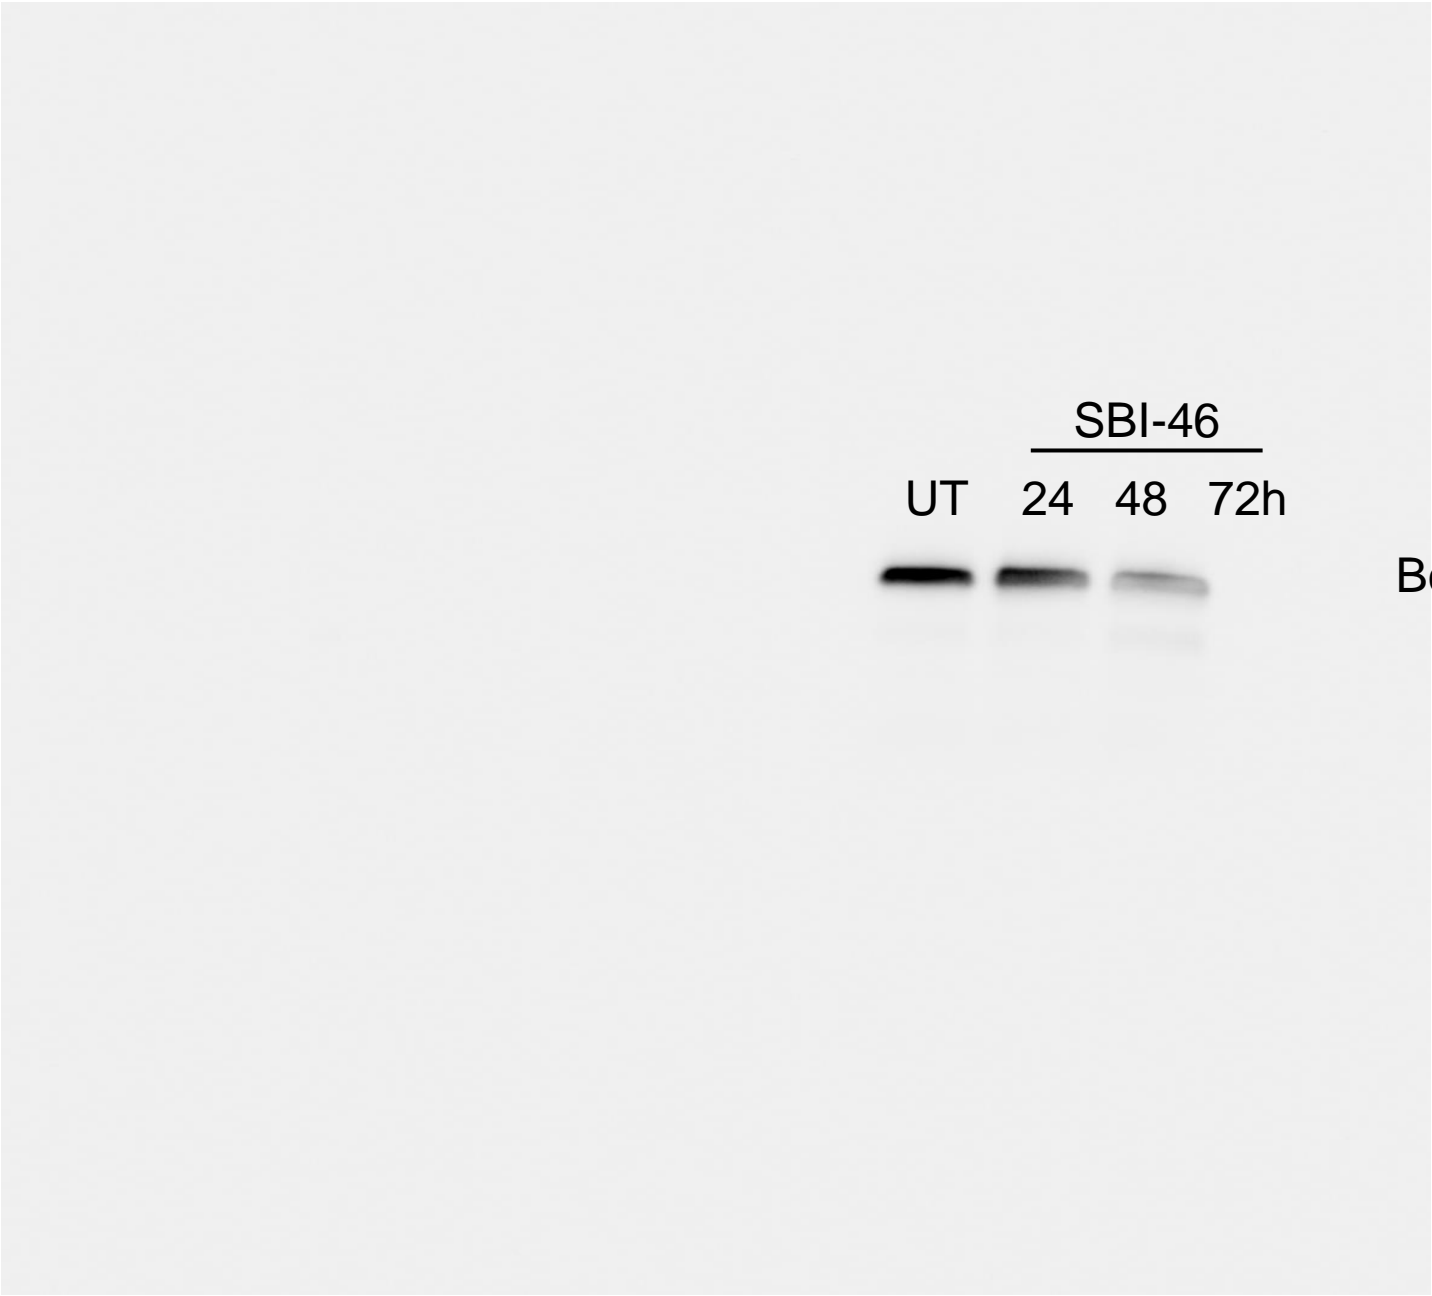

Fig.4E

Bcl-xl

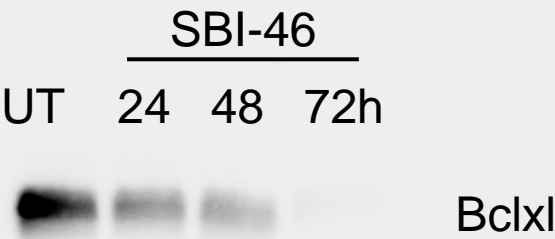

Fig.4E

Actin

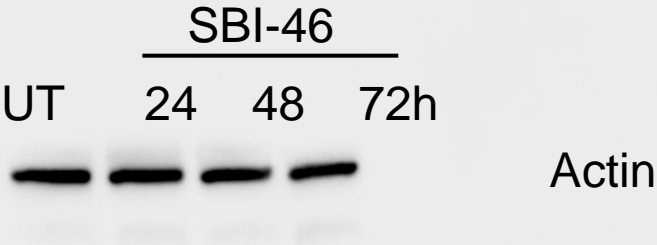

Fig.4F

Bax

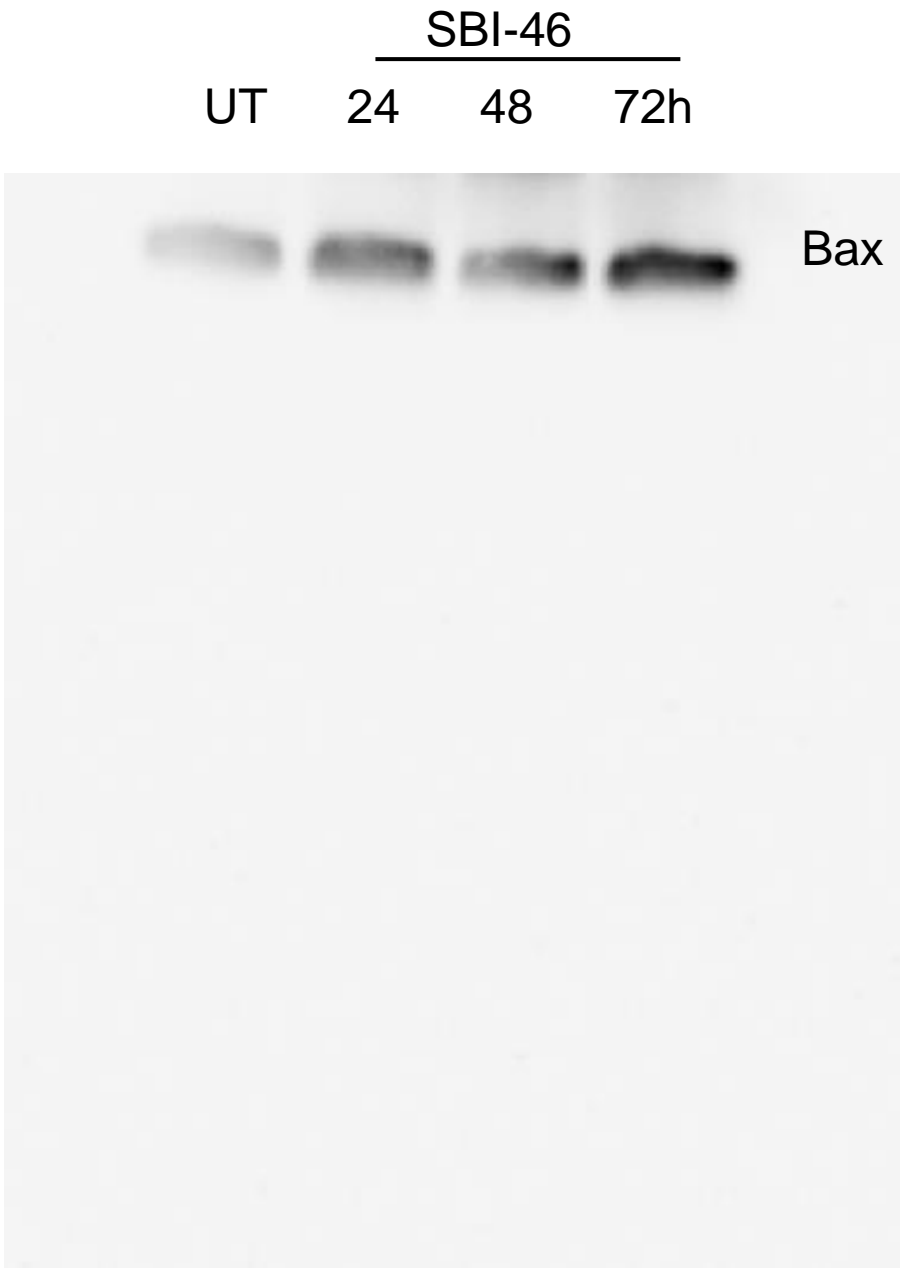



Fig.4F

Bcl2

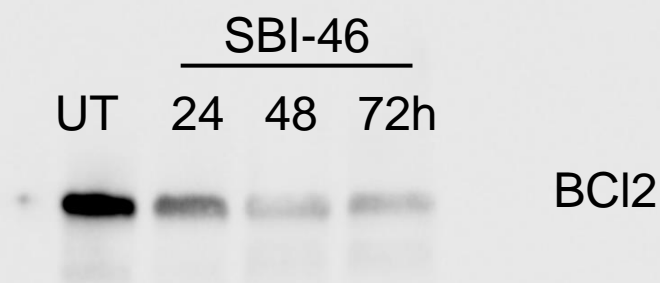

Fig.4F

Bclxl

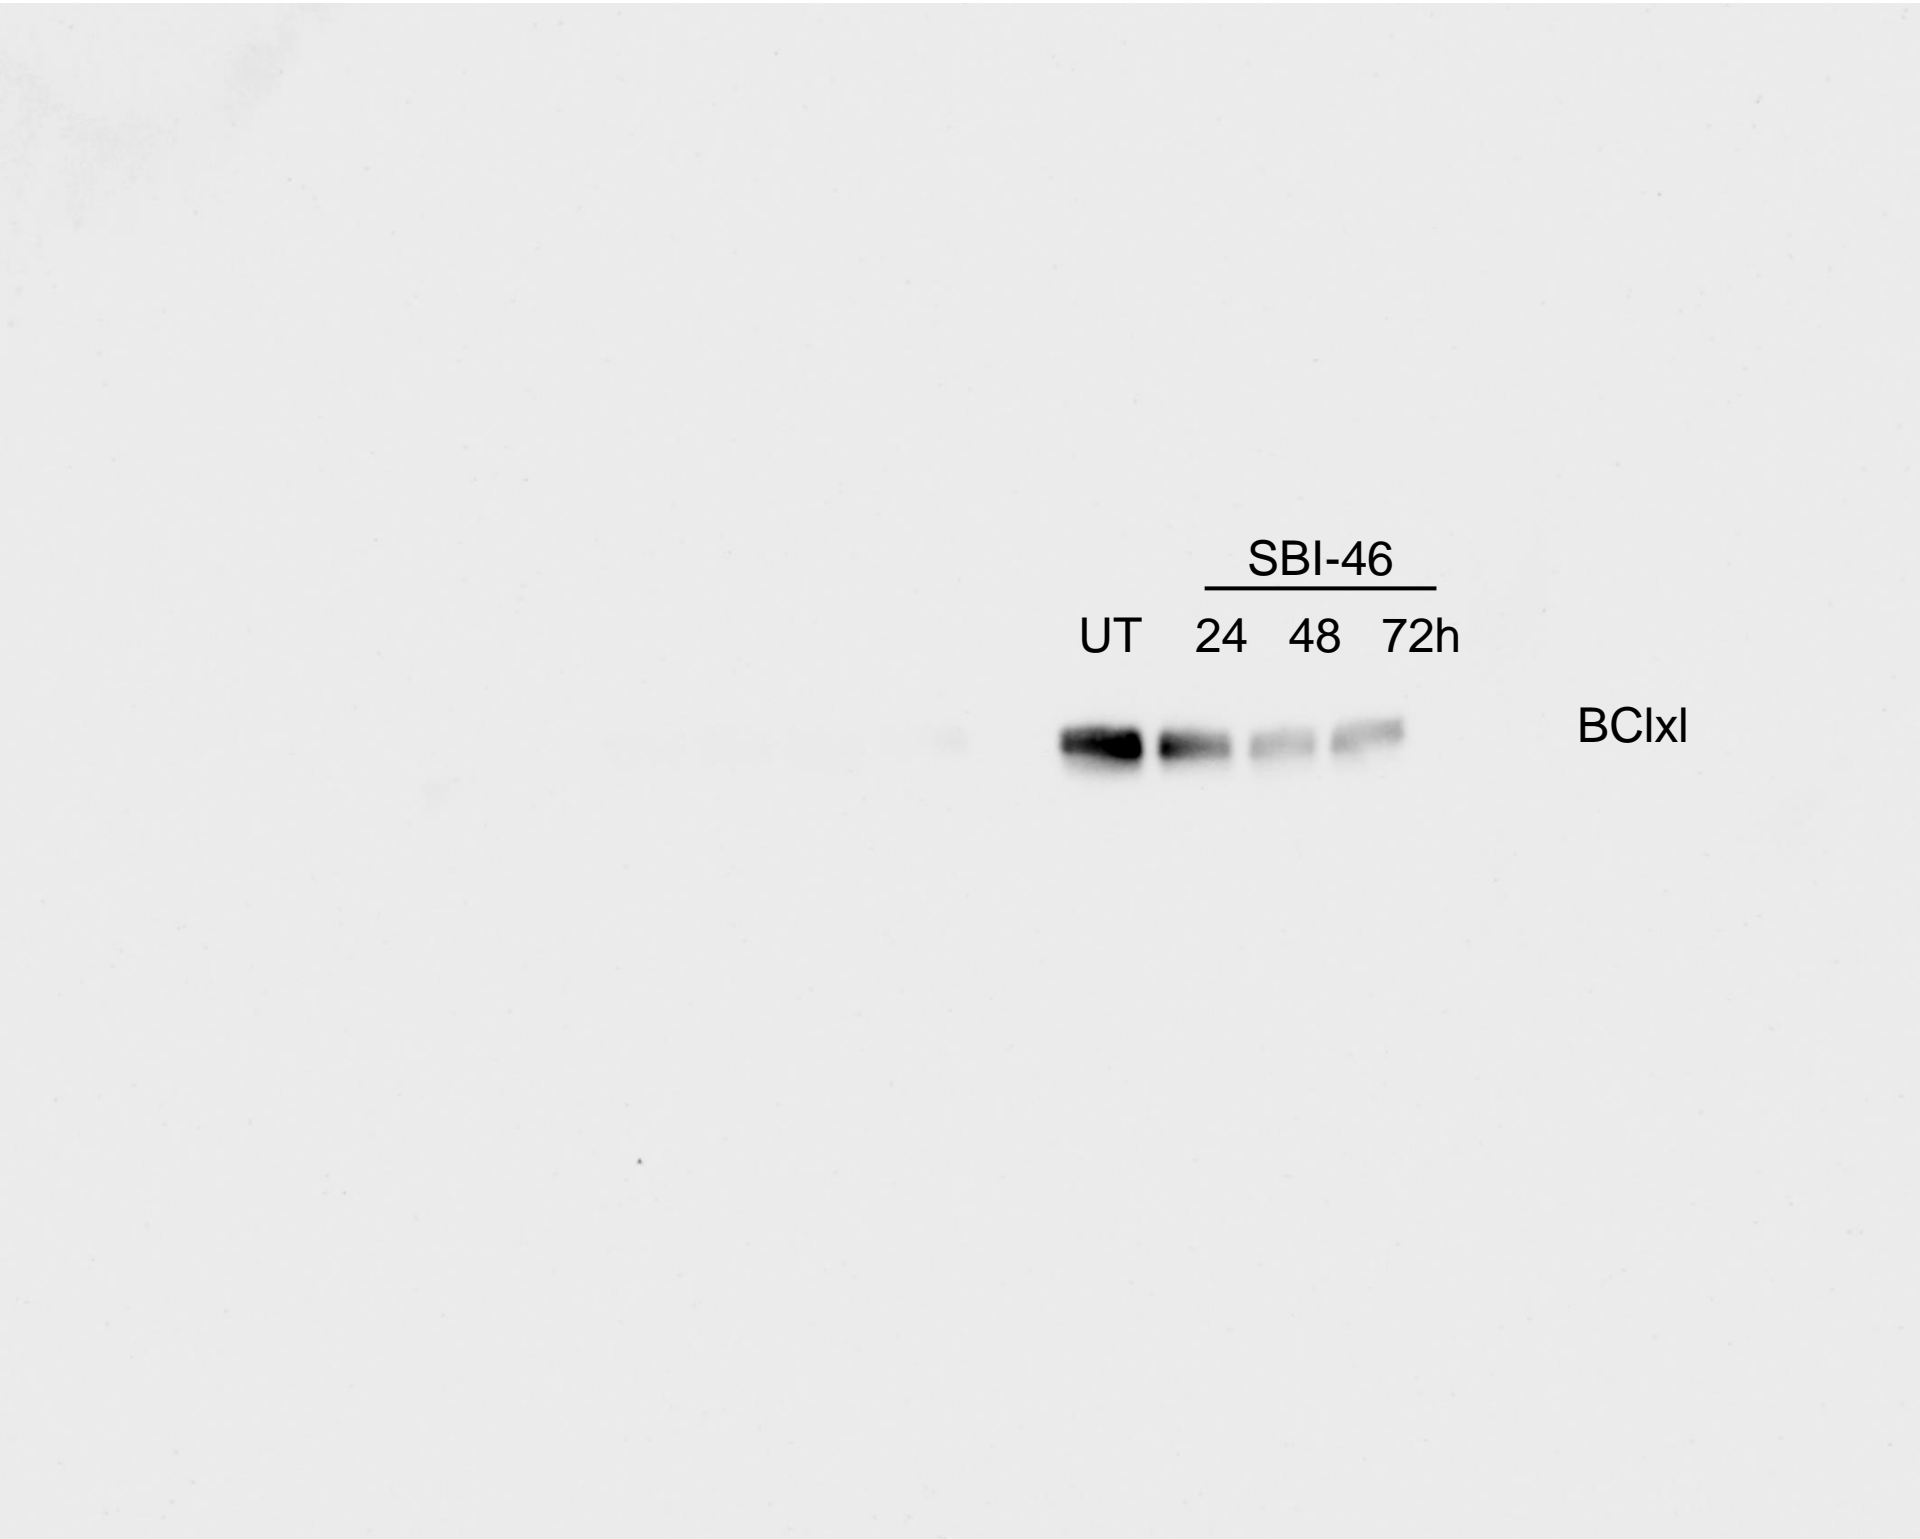

Fig.4F

Actin

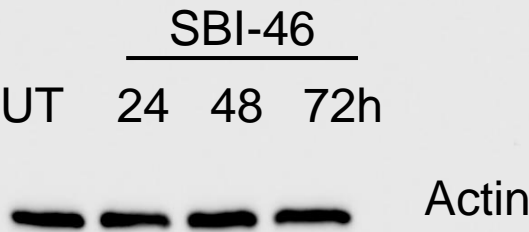

Supplement: s1 [file s1]
